# Supplementary material for: Gene Expression of Caenorhabditis elegans Neurons Carries Information on Their Synaptic Connectivity
Source: PLOS journal article supplement (doi:10.1371/journal.pcbi.0020167), 2006-01-01
Supplement: S1 (10.1371/journal.pcbi.0020167.s001) [file journal.pcbi.0020167.s001]

Table S1: Neuron List

List of the 98 asymmetric neurons included in the analysis

| Index | Neuron | Sensory[[1]](#footnote-2) | Amphid[[2]](#footnote-3) | Cord[[3]](#footnote-4) | Motor[[4]](#footnote-5) | Ring[[5]](#footnote-6) | Labial[[6]](#footnote-7) | Inter[[7]](#footnote-8) |
| --- | --- | --- | --- | --- | --- | --- | --- | --- |
| 1 | ADAR |  |  |  |  | + |  | + |
| 2 | ADER | + |  |  |  |  |  |  |
| 3 | ADFR | + | + |  |  |  |  |  |
| 4 | ADLR | + | + |  |  |  |  |  |
| 5 | AFDR | + | + |  |  |  |  |  |
| 6 | AIAR |  | + |  |  |  |  | + |
| 7 | AIBR |  | + |  |  |  |  | + |
| 8 | AIMR |  |  |  |  | + |  | + |
| 9 | AINR |  |  |  |  | + |  | + |
| 10 | AIYR |  | + |  |  |  |  | + |
| 11 | AIZR |  | + |  |  |  |  | + |
| 12 | ALA |  |  |  |  |  |  |  |
| 13 | ALMR | + |  |  |  |  |  |  |
| 14 | ALNR |  |  |  |  |  |  |  |
| 15 | AQR |  |  |  |  |  |  |  |
| 16 | ASER | + | + |  |  |  |  |  |
| 17 | ASGR | + | + |  |  |  |  |  |
| 18 | ASHR | + | + |  |  |  |  |  |
| 19 | ASIR | + | + |  |  |  |  |  |
| 20 | ASJR | + | + |  |  |  |  |  |
| 21 | ASKR | + | + |  |  |  |  |  |
| 22 | AUAR | + | + |  |  |  |  |  |
| 23 | AVAR |  |  | + |  |  |  | + |
| 24 | AVBR |  |  | + |  |  |  | + |
| 25 | AVDR |  |  | + |  |  |  | + |
| 26 | AVER |  |  | + |  |  |  | + |
| 27 | AVFR |  |  |  |  |  |  | + |
| 28 | AVHR |  |  |  |  |  |  |  |
| 29 | AVJR |  |  |  |  |  |  |  |
| 30 | AVKR |  |  | + |  | + |  | + |
| 31 | AVL |  |  | + |  | + |  | + |
| 32 | AVM | + |  |  |  |  |  |  |
| 33 | AWAR | + | + |  |  |  |  |  |
| 34 | AWBR | + | + |  |  |  |  |  |
| 35 | AWCR | + | + |  |  |  |  |  |
| 36 | BAGR |  |  |  |  |  |  |  |
| 37 | BDUR |  |  |  |  |  |  |  |
| 38 | CEPDR |  |  |  |  |  |  |  |
| 39 | CEPVR |  |  |  |  |  |  |  |
| 40 | DVA |  |  |  |  | + |  | + |
| 41 | DVB |  |  |  |  | + |  | + |
| 42 | DVC |  |  |  |  | + |  | + |
| 43 | FLPR |  |  |  |  |  |  |  |
| 44 | HSNR |  |  |  |  |  |  |  |
| 45 | IL1DR |  |  |  |  |  | + |  |
| 46 | IL1R |  |  |  |  |  | + |  |
| 47 | IL1VR |  |  |  |  |  | + |  |
| 48 | IL2DR |  |  |  |  |  | + |  |
| 49 | IL2R |  |  |  |  |  | + |  |
| 50 | IL2VR |  |  |  |  |  | + |  |
| 51 | OLLR |  |  |  |  |  | + |  |
| 52 | LQDR |  |  |  |  |  | + |  |
| 53 | LQVR |  |  |  |  |  | + |  |
| 54 | PLNR |  |  |  |  |  |  | + |
| 55 | PVCR |  |  | + |  |  |  | + |
| 56 | PVNR |  |  |  |  |  |  | + |
| 57 | PVPR |  |  |  |  |  |  | + |
| 58 | PVQR |  |  |  |  |  |  | + |
| 59 | PVR |  |  | + |  | + |  | + |
| 60 | RIAR |  |  |  |  | + |  | + |
| 61 | RIBR |  |  |  |  | + |  | + |
| 62 | RICR |  |  |  |  | + |  | + |
| 63 | RID |  |  |  |  | + |  | + |
| 64 | RIFR |  |  |  |  | + |  | + |
| 65 | RIGR |  |  |  |  | + |  | + |
| 66 | RIH |  |  |  |  | + |  | + |
| 67 | RIMR |  |  |  |  | + |  | + |
| 68 | RIPR |  |  |  |  | + |  | + |
| 69 | RIR |  |  |  |  | + |  | + |
| 70 | RIS |  |  |  |  | + |  | + |
| 71 | RIVR |  |  |  |  | + |  | + |
| 72 | RMDDR |  |  |  | + | + |  | + |
| 73 | RMDR |  |  |  | + | + |  | + |
| 74 | RMDVR |  |  |  | + | + |  | + |
| 75 | RMED |  |  |  | + | + |  |  |
| 76 | RMER |  |  |  | + | + |  |  |
| 77 | RMEV |  |  |  | + | + |  |  |
| 78 | RMFR |  |  |  | + | + |  | + |
| 79 | RMGR |  |  |  |  | + |  | + |
| 80 | RMHR |  |  |  | + | + |  | + |
| 81 | SAADR |  |  |  |  | + |  | + |
| 82 | SAAVR |  |  |  |  | + |  | + |
| 83 | SDQR |  |  | + |  | + |  | + |
| 84 | SIADR |  |  | + |  | + |  | + |
| 85 | SIAVR |  |  | + |  | + |  | + |
| 86 | SIBDR |  |  | + |  | + |  | + |
| 87 | SIBVR |  |  | + |  | + |  | + |
| 88 | SMBDR |  |  |  | + | + |  | + |
| 89 | SMBVR |  |  |  | + | + |  | + |
| 90 | SMDDR |  |  |  | + | + |  | + |
| 91 | SMDVR |  |  |  | + | + |  | + |
| 92 | URADR |  |  |  | + | + |  |  |
| 93 | URAVR |  |  |  | + | + |  |  |
| 94 | URBR |  |  |  |  |  |  |  |
| 95 | URXR |  |  |  |  | + |  | + |
| 96 | URYDR |  |  |  |  |  |  |  |
| 97 | URYVR |  |  |  |  |  |  |  |
| 98 | VB1 |  |  | + | + |  |  |  |
|  | Total | 16 | 17 | 14 | 15 | 44 | 9 | 53 |

1. Includes neurons descried as sensory and amphid neurons according to WormBase. [↑](#footnote-ref-2)
2. Includes neurons descried as amphid neurons and amphid interneurons according to WormBase. [↑](#footnote-ref-3)
3. Includes all neurons descried as cord neurons (among other descriptions as well) according to WormBase. [↑](#footnote-ref-4)
4. Includes all neurons descried as ring motor neurons and ventral cord motor neurons according to WormBase. [↑](#footnote-ref-5)
5. Includes all neurons descried as ring motor neurons, ring neurons and ring interneurons according to WormBase. [↑](#footnote-ref-6)
6. Includes neurons descried as inner labial and outer labial neurons according to WormBase. [↑](#footnote-ref-7)
7. Includes all types of interneurons according to WormBase. [↑](#footnote-ref-8)
